# Supplementary material
Source: publisher figshare collection journal article supplement (https://acs.figshare.com/ndownloader/files/4854232)
Supplement: Supplementary file 1 [file 4854232]

*Supporting information for*

# Photosensitizer-Conjugated Hyaluronic Acid-Shielded Polydopamine Nanoparticles for Targeted Photo-mediated Tumor Therapy

*Jieun Han<sup>‡</sup>, Wooram Park<sup>‡</sup>, Sin-jung Park, and Kun Na\**

Center for Photomedicine, Department of Biotechnology, The Catholic University of Korea,  
43 Jibongro, Wonmi-gu, Bucheon-si, Gyeonggi do, 14662, Republic of Korea

<sup>‡</sup>These authors contributed equally.

\*Corresponding Authors

**Kun Na, Ph.D.,**

Center for Photomedicine, Department of Biotechnology

The Catholic University of Korea

43 Jibongro, Wonmi-gu, Bucheon-si, Gyeonggi do,

420-743, Korea

E-mail: [kna6997@catholic.ac.kr](mailto:kna6997@catholic.ac.kr)

## **Experimental methods for supporting information**

***Biodegradation of PHPD-NPs:*** The PHPD-NPs (0.5 mg/mL) were suspended in PBS buffer (150 mM) solution. After treatment of hydroxyl peroxide (5 mM) for 24 h, the color change was observed and taken by digital camera.

***Flow cytometry quantification of the CD44 receptor expression level:*** NIH3T3 and MDA-MB-231 cells were washed twice with DPBS and incubated with FITC labeled anti-CD44 antibody (clone IM7, LSBio, Seattle, Washington) at 4 °C for 30 min followed by washing with DPBS and subjecting to flow cytometry. The flow cytometry was performed using a BD FACS Canto II flow cytometry analyzer and FACS Diva software (BD Biosciences).

***Energy-dependent endocytosis behavior of PHPD-NPs:*** MDA-MB-213 cells were incubated with PHPD-NPs (0.1 mg/mL) in a SF culture medium for 4 h at 4 °C or 37 °C under 5 % CO<sub>2</sub>. After incubation, the cells were analyzed by flow cytometry and CLSM imaging system.

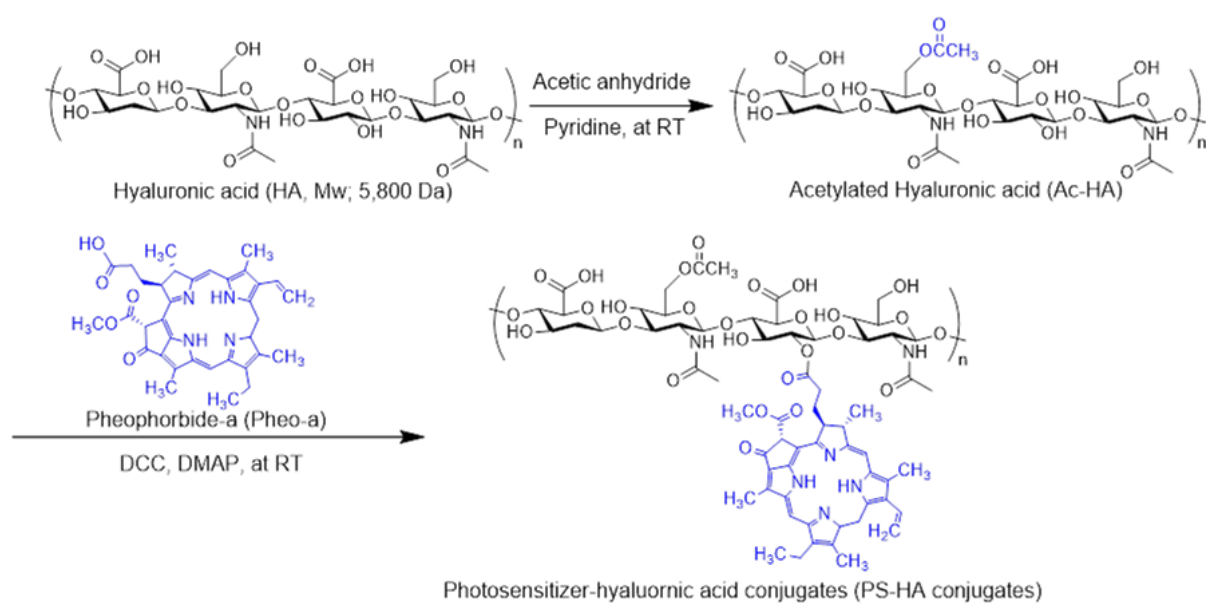

**Figure S1.** Chemical synthetic route for PS-HA conjugates.

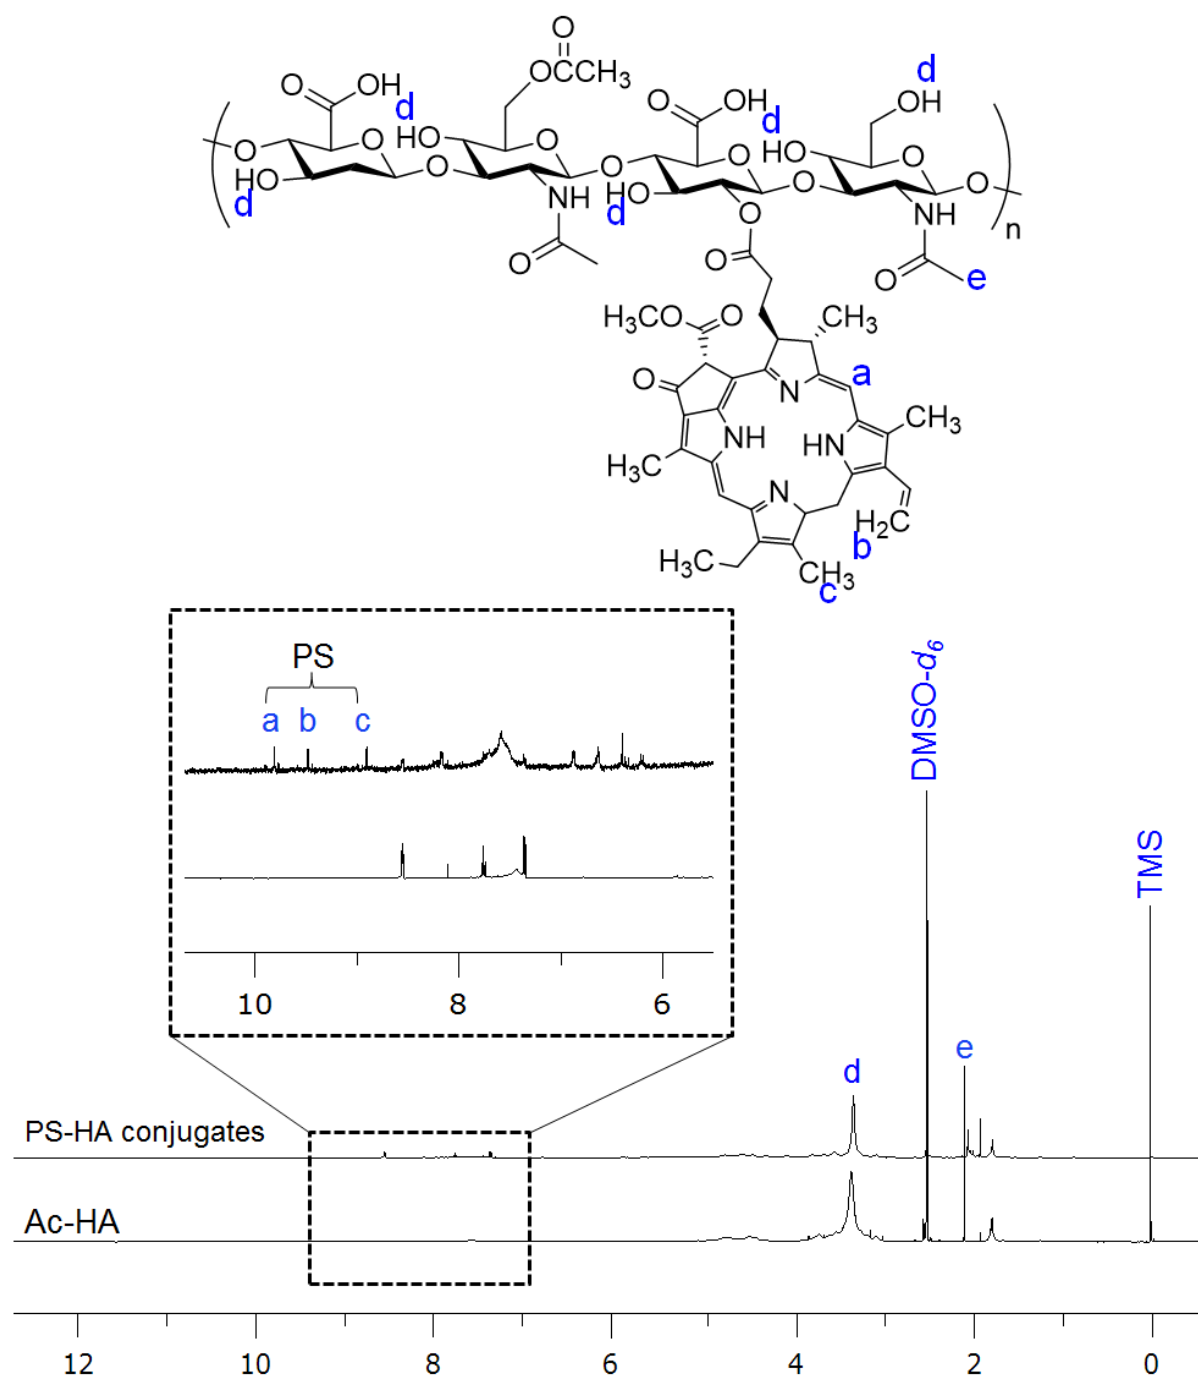

**Figure S2.**  $^1\text{H}$ -NMR analysis of Ac-HA and PS-HA conjugates in  $\text{DMSO-}d_6$ .

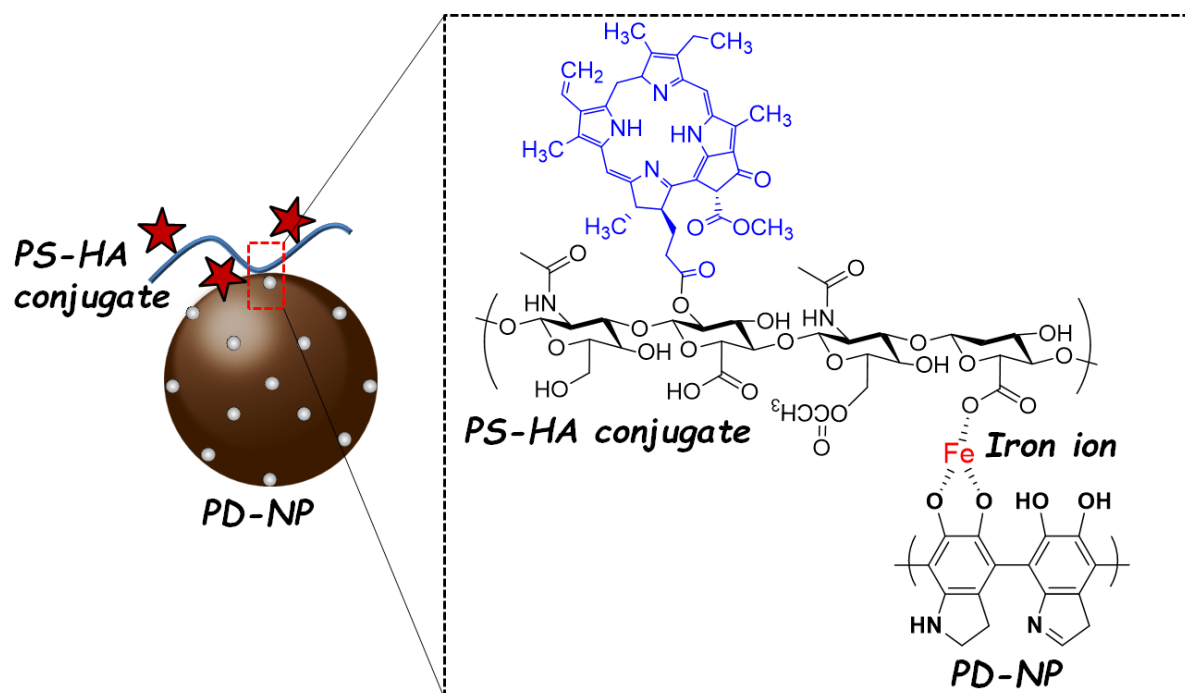

**Figure S3.** Schematic illustration of iron-mediated coordination in preparation of PHPD-NPs.

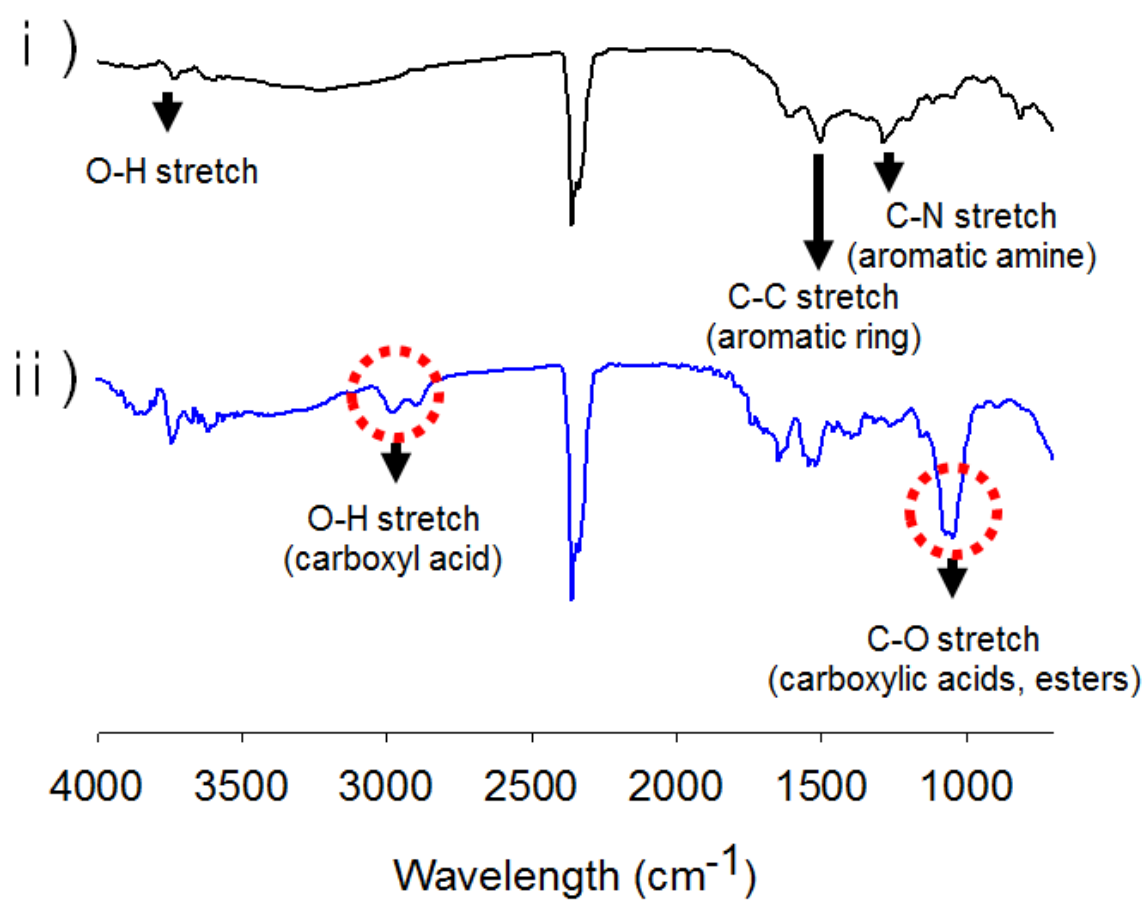

**Figure S4.** FT-IR analysis of i ) PD-NPs and ii) PHPD-NPs.

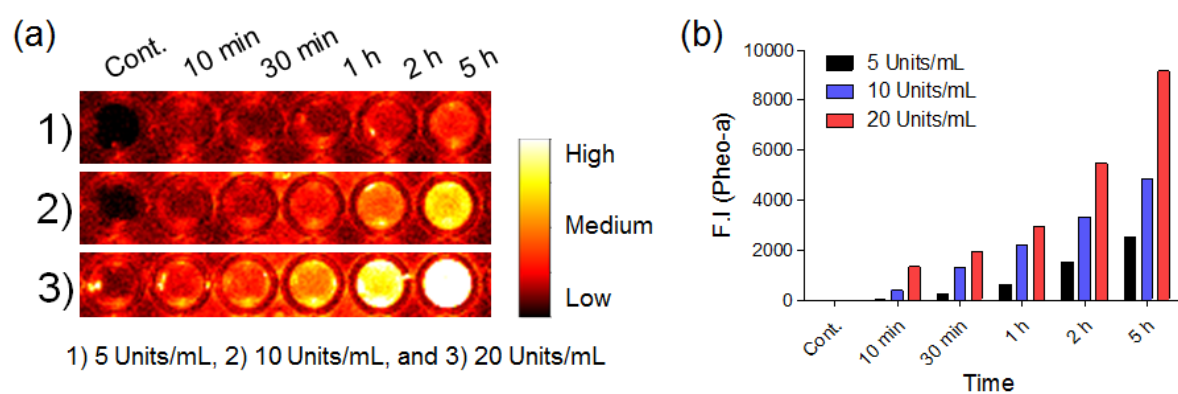

**Figure S5.** Photo-activity measurement of PHPD-NPs in the presence of HAase. (a) Fluorescent images and (b) quantitative fluorescent intensity analysis of the PHPD-NPs incubated with different concentration of HAase over time.

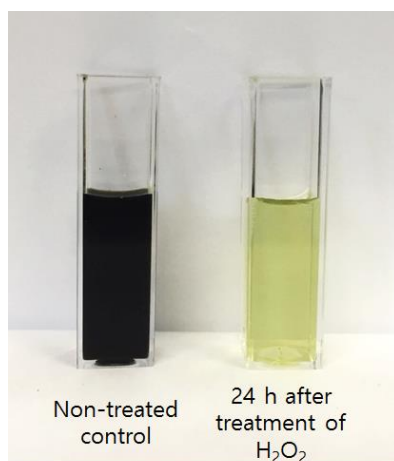

**Figure S6.** Biodegradation of PHPD-NPs. Photograph of non-treated PHPD-NPs dispersion (0.5 mg/mL) and after addition of H<sub>2</sub>O<sub>2</sub> (5 mM). The color (dark brown) of PHPD-NPs faded after treatment of H<sub>2</sub>O<sub>2</sub>.



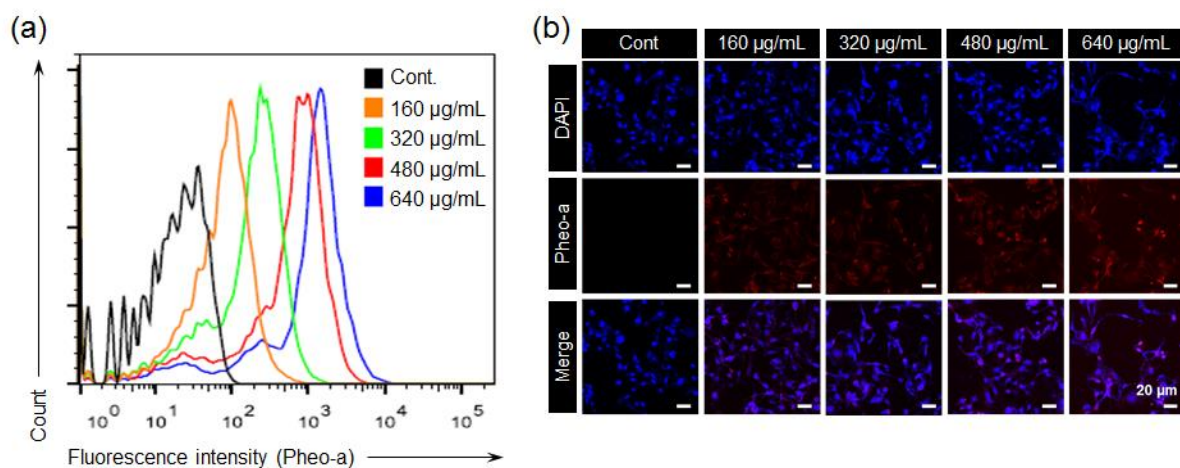

**Figure S7.** *In vitro* cellular internalization of PHPD-NPs at different concentrations of PD-NPs: (a) Flow cytometry quantification of the cellular internalization of PHPD-NPs against MDA-MB-231 cells at different concentrations of PD-NPs. (b) Confocal laser scanning microscopy image of MDA-MB-231 cells treated with PHPD-NPs as different concentration. (Incubation time: 4 h, scale bar: 20  $\mu\text{m}$ ).

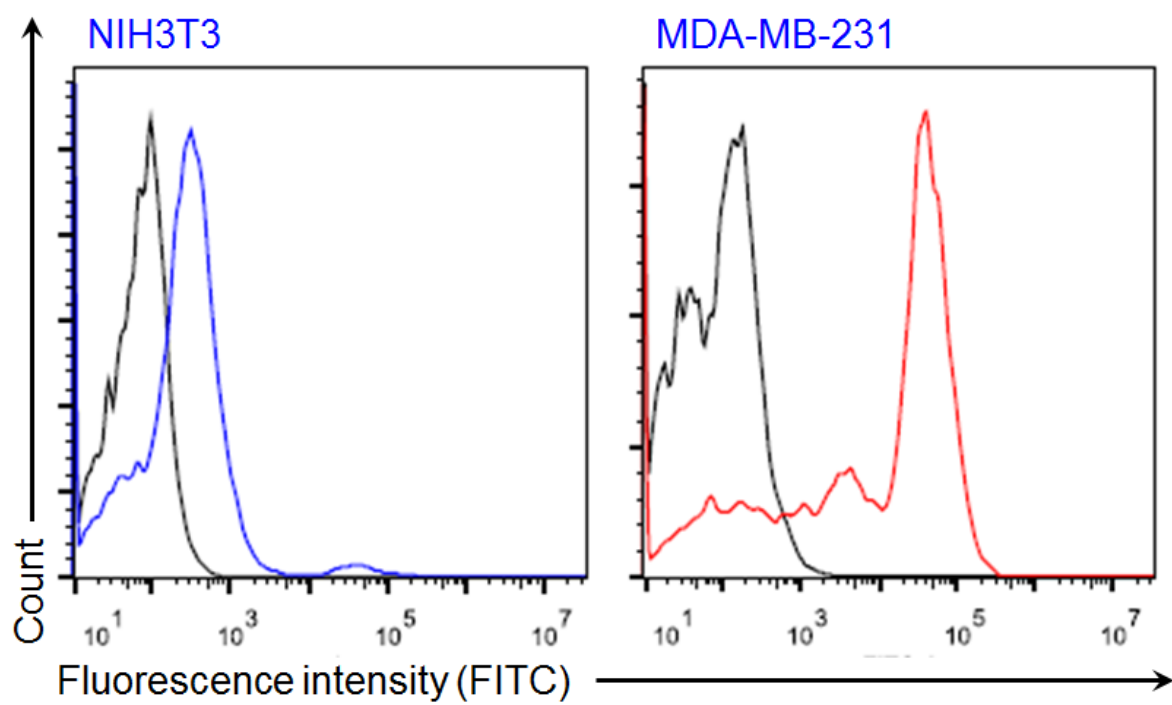

**Figure S8.** Flow cytometry quantification of the CD44 receptor expression level in NIH3T3 and MDA-MB-231 cells.

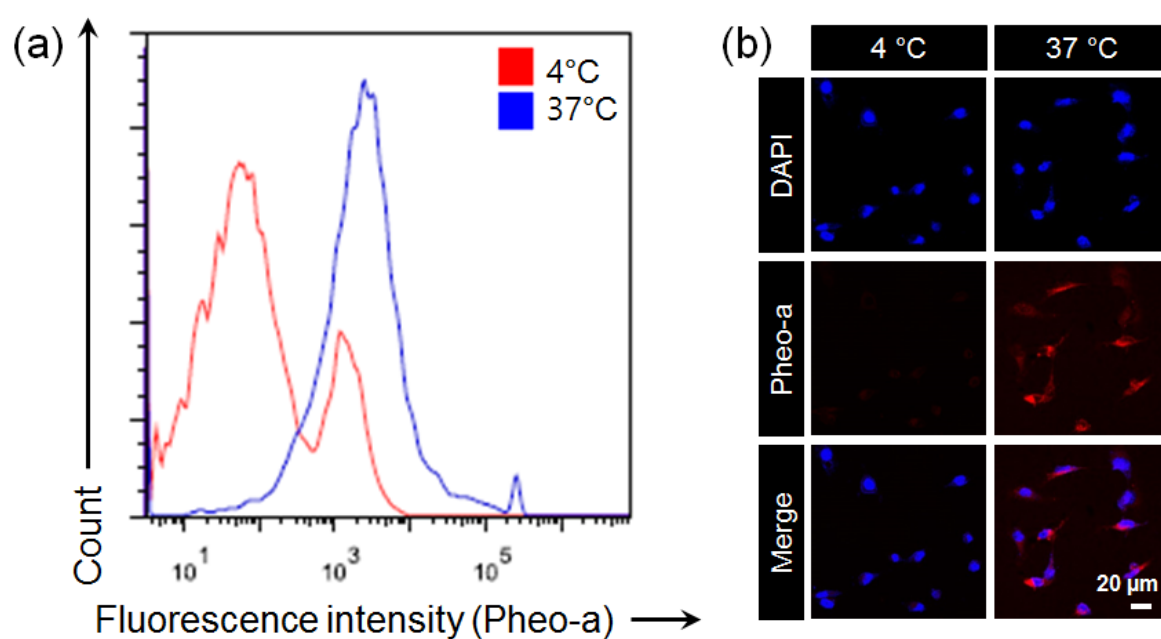

**Figure S9.** Energy-dependent endocytosis behavior of PHPD-NPs. (a) Flow cytometry quantification of the cellular internalization of PHPD-NPs against MDA-MB-231 cells at different temperatures (4 and 37 °C). (b) Confocal laser scanning microscopy images of MDA-MB-231 cells treated with PHPD-NPs at different temperatures (4 and 37 °C).

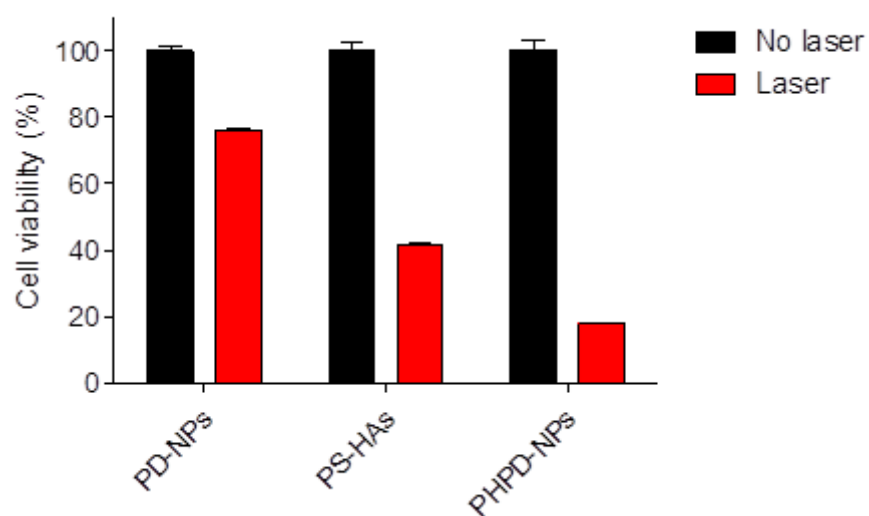

**Figure S10.** Cell viability of MDA-MB-231 cells treated with PD-NPs, PS-HAs and PHPD-NPs under laser irradiation at 3.0 J/cm<sup>2</sup> power.

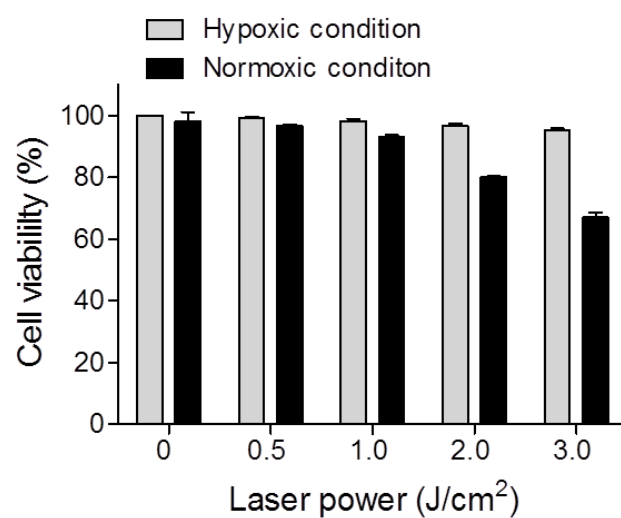

**Figure S11.** Cell viability of MDA-MB-231 cells treated with free pheo-a (2.4 µg/mL) in the hypoxic and normoxic conditions under different laser irradiation power. The photo-mediated cytotoxicity of free pheo-a was significantly decreased in hypoxic conditions when compared with that of normoxic conditions.

**Table S1.** Chemical characterization of PS-HA conjugates

| <b>Code</b> | <b>DS of acetyl groups<sup>(a)</sup></b> | <b>DS of PS molecules<sup>(b)</sup></b> |
|-------------|------------------------------------------|-----------------------------------------|
| PS-HA       | 0.40 ±0.02                               | 0.10 ±0.03                              |

<sup>(a)</sup>Degree of substitution of acetyl groups per HA unit (2 glucose rings), determined by <sup>1</sup>H-NMR (n=3).

<sup>(b)</sup>Degree of substitution of pheo-a molecules per HA unit (2 glucose rings), determined by UV-Vis spectrophotometer (n=3).
